# Supplementary material for: Continuous dry–wet spinning of white, stretchable, and conductive fibers of poly(3-hydroxybutyrate-co-4-hydroxybutyrate) and ATO@TiO2 nanoparticles for wearable e-textiles
Source: Royal Society of Chemistry journal article supplement (doi:10.1039/d0tc01310b), 2020-01-01
Supplement: d0tc01310b1.pdf [file d0tc01310b1.pdf]

## Supplementary Information

### **Continuous dry-wet spinning of white, stretchable and conductive fibers of poly(3-hydroxybutyrate-co-4-hydroxybutyrate) and ATO@TiO<sub>2</sub> nanoparticles for wearable e-textiles**

*Chunxia Gao,<sup>a†</sup> Sisi He,<sup>b†</sup> Longbin Qiu,<sup>c</sup> Mingxu Wang,<sup>a</sup> Jiefeng Gao,<sup>a</sup> and Qiang Gao*

*\*ad*

*<sup>a</sup>School of Chemistry and Chemical Engineering, Yangzhou University, Yangzhou 225002, China*

*<sup>b</sup>School of Science, Harbin Institute of Technology (Shenzhen), University Town, Shenzhen 518055, Guangdong, China*

*<sup>c</sup>Department of Mechanical and Energy Engineering, Southern University of Science and Technology, Shenzhen 518055, Guangdong, China*

*<sup>d</sup>State Key Laboratory of Molecular Engineering of Polymers, Fudan University, Shanghai 200438, China*

**Corresponding author:** Dr. Qiang Gao, E-mail: [gaoqiang@yzu.edu.cn](mailto:gaoqiang@yzu.edu.cn)

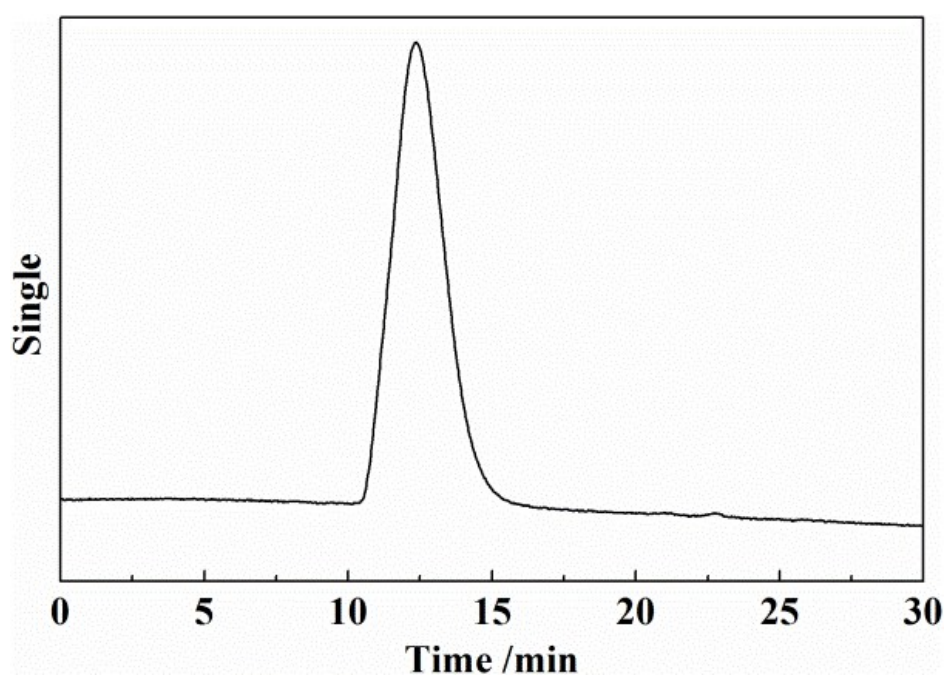

**Figure S1.** Gel Permeation Chromatography Curve of P3HB4HB.

Result of GPC data showed that the weight-average molecular weight ( $M_w$ ) was  $1.14 \times 10^5$  g/mol.

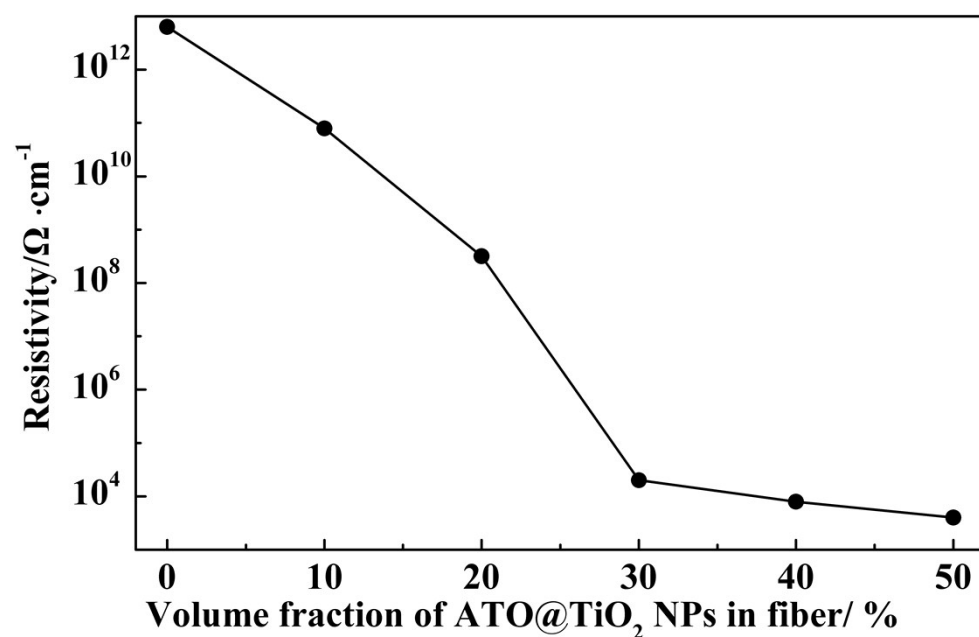

**Figure S2.** Resistivity of PATN fibers with different volume fraction of ATO@TiO<sub>2</sub> NPs.

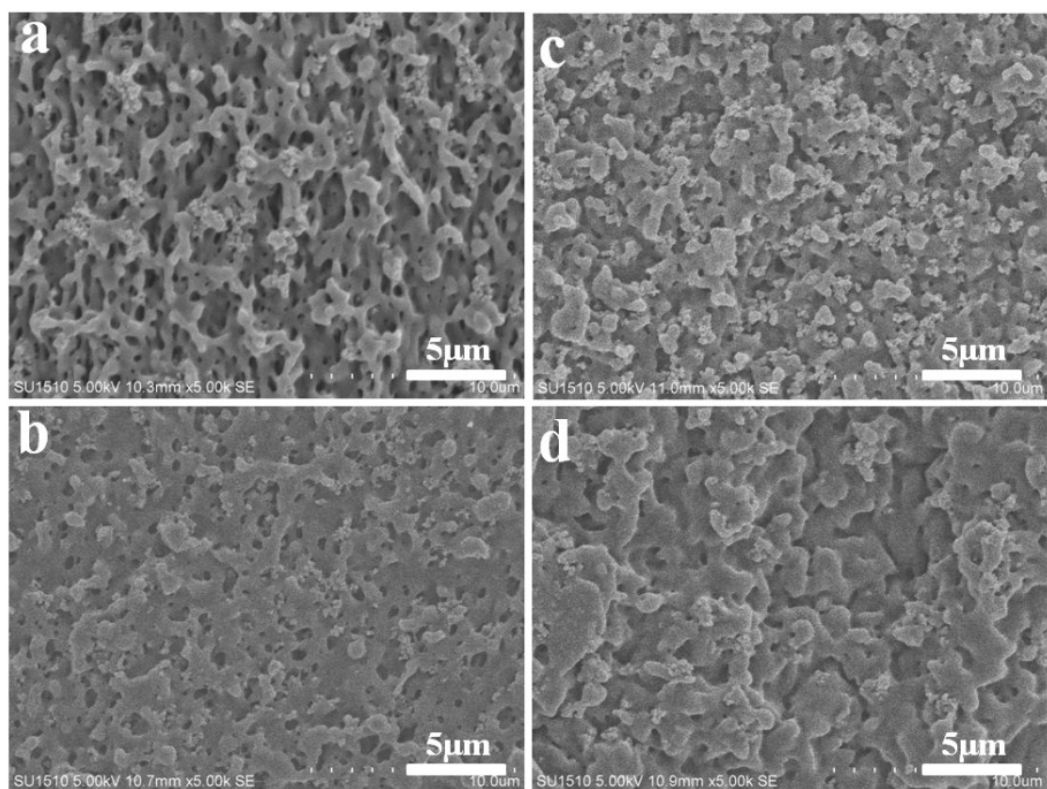

**Figure S3.** SEM images of typical surface for P3HB4HB composites microfibers with different solvent systems: (a) chloroform, (b) DMSO: chloroform=1:1, (c) DMSO: chloroform=5:1, (d) DMSO.

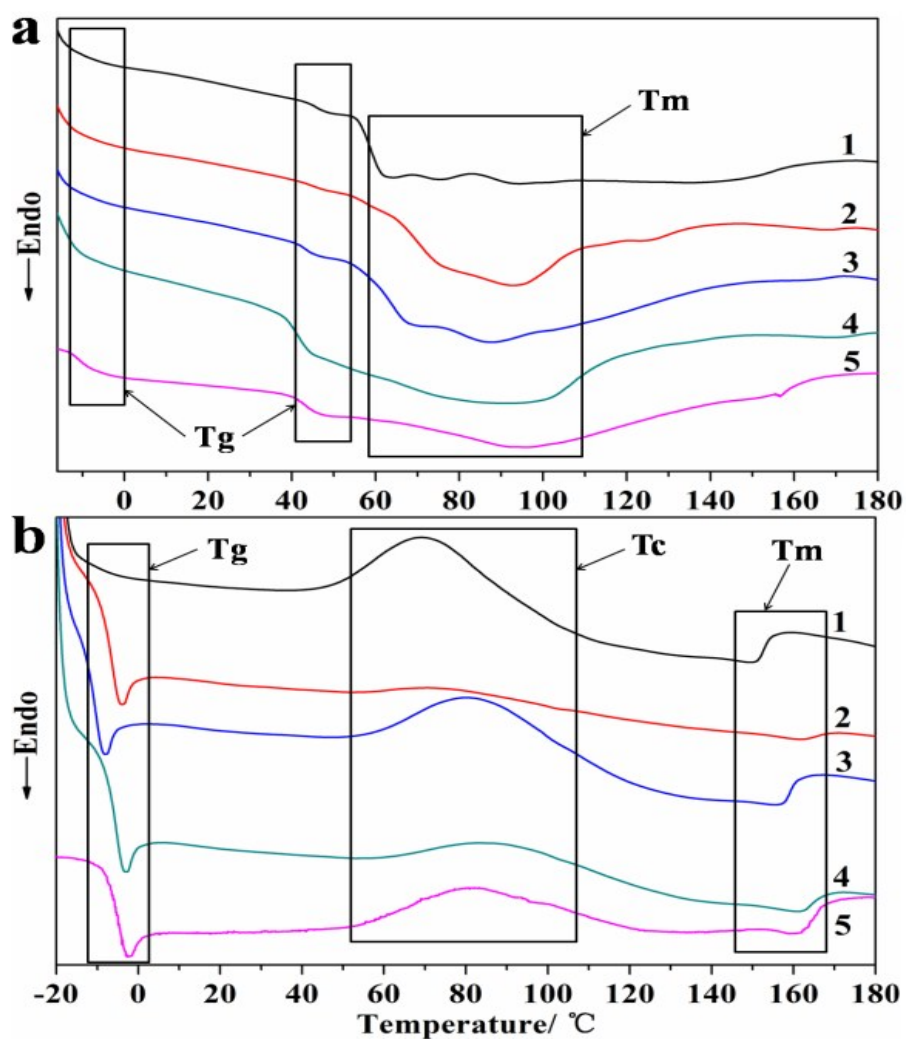

**Figure S4.** DSC curves of PANT fibers with different solvent ratios of DMSO:chloroform (1) 0:1, (2) 5:1, (3) 3:1, (4) 1:1, (5) 1:0.

Differential scanning calorimeter (DSC) (Q200, TA, America) was used to studying the melting and crystallization behavior of the composites. The studies were performed in the temperature range of -20 to 180°C at a rate of 5°C/min in nitrogen atmosphere.

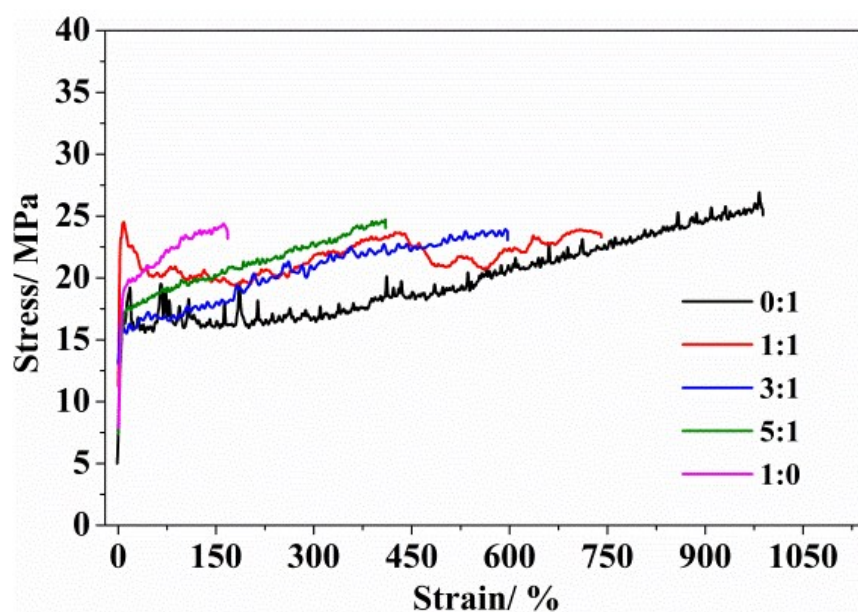

**Figure S5.** Tensile properties of the PANT fibers prepared from mixed solvent of DMSO and chloroform.

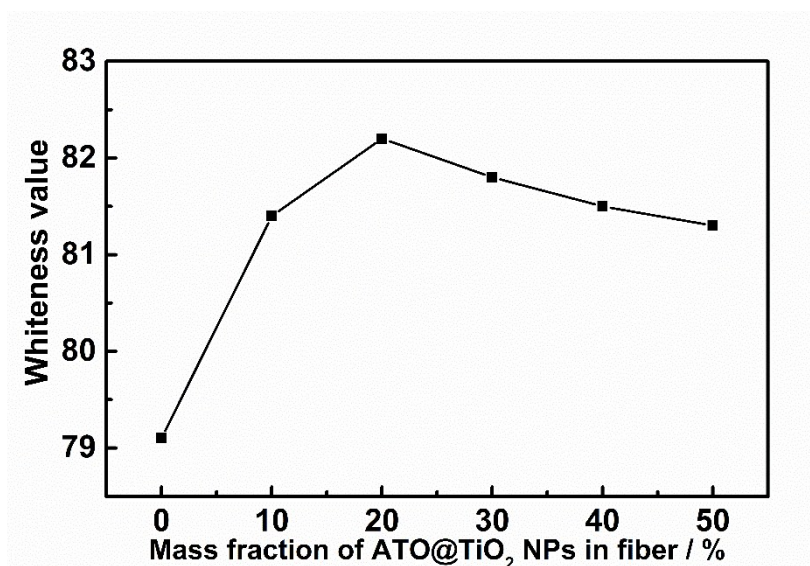

**Figure S6.** Whiteness index of PATN fibers with different mass fraction of ATO@TiO<sub>2</sub> NPs.

The whiteness index of fiber was displayed directly on the screen of a color reader (CR-14, Konica Minolta, Japan).

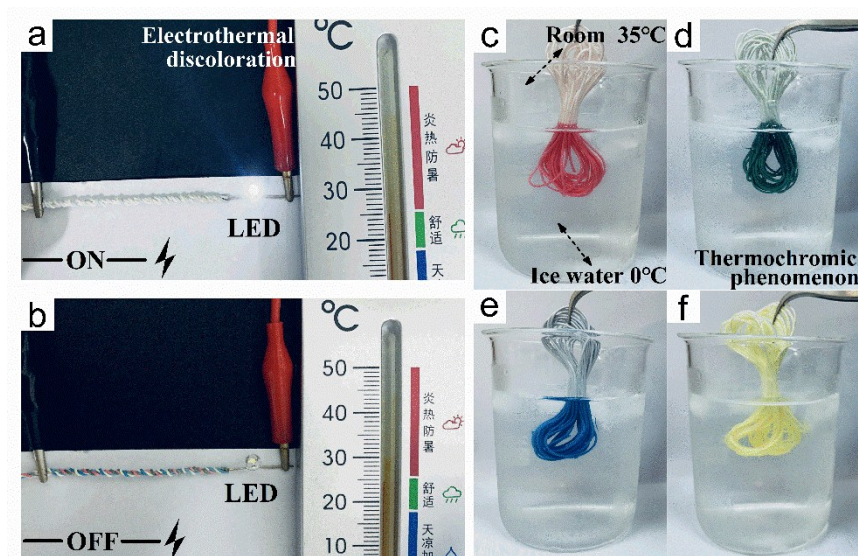

**Figure S7.** Optical images of PATN fibers containing different temperature-sensitive pigments (a) Power on (24v), (b) Power off, (c-f) Four PATN fibers with different temperature-sensitive pigments discolored at the interface of air and ice water.
